# Supplementary material for: Differences in leaf and root litter decomposition in tropical montane rainforests are mediated by soil microorganisms not by decomposer microarthropods
Source: PeerJ. 2022 Nov 3;10:e14264. doi: 10.7717/peerj.14264 (PMC9637353; doi:10.7717/peerj.14264)
Supplement: Data S1 [file peerj-10-14264-s001.xlsx]

## Sheet: complete_dataset
Time	Altitude	Litter type	Mesh size	Block	Mloss	C	N	C-to-N	BR	Cmic	Acrogalumna cubana	Neoctenogalumna longiciliata	Amazoppia tricuspidata	Arceremaeus incaensis	Arcoppia dechambrierorum	Arcoppia tripartita	Beckiella elongata	Brachioppia deliciosa	Brachioppia sp.3	Brachioppiella n.sp. 2	Caudamaeolus petalus	Zetomimus polpaicoensis	Ceratorchestes globosus	Ceratorchestes sp.1	Acrogalumna n.sp. 1	Scheloribates n.sp. 1	Ceratozetes n.sp. 1	Hermannobates bifurcatus	Hypochthonius	Lanceoppia n.sp. 2	Liebstadia n.sp. 1	Liebstadia n.sp. 2	Malacoangelia	Pulchroppia n.sp. 1	Cosmozetes n.sp. 2	Cosmozetes n.sp. 3	Cosmozetes reticulatus	Crotonia reticulata	Campachipteria brevisetosa	Cultroribula zicsii	Cyrthermannia florence	Damaeus flagellatus	Dynatozetes n.sp. 1	Enarthronota n. sp. 1	Eohypochthonius gracilis	Eohypochthonius n.sp. 1	Epieremulus longiseta	Epieremulus granulatus	Epieremulus n. sp. 1
6 months	1000 m	Leaf	45um	3	7.05062	49.7919	1.60387	31.0448	78.1947	6778.33	0	0	0	0	0	0	0	0	0	0	0	0	0	0	0	0	0	0	0	0	0	0	0	0	0	0	0	0	0	0	0	0	0	0	0	0	0	0	0
6 months	1000 m	Leaf	45um	4	7.31819	49.2766	1.87678	26.2559	79.2516	7074.46	0	0	0	0	0	0	0	0	0	0	0	0	0	0	0	0	0	0	0	0	0	0	0	0	0	0	0	0	0	0	0	0	0	0	0	0	0	0	0
6 months	1000 m	Leaf	45um	5	6.43704	48.0111	1.90091	25.2569	62.25	6003.67	0	0	0	0	0	0	0	0	0	0	0	0	0	0	0	0	0	0	0	0	0	0	0	0	0	0	0	0	0	0	0	0	0	0	0	0	0	0	0
6 months	1000 m	Roots	45um	3	7.0865	49.6391	1.19246	41.6276	79.1094	6485.41	0	0	0	0	0	0	0	0	0	0	0	0	0	0	0	1	0	0	0	0	0	0	0	0	0	0	0	0	0	0	0	0	0	0	3	1	0	0	0
6 months	1000 m	Roots	45um	4	6.18	48.333	1.16628	41.4419	83.3547	8397.19	0	0	0	0	0	0	0	0	0	0	0	0	0	0	0	0	0	0	0	0	0	0	0	0	0	0	0	0	0	0	1	0	0	0	7	3	0	0	0
6 months	1000 m	Roots	45um	5	5.76947	49.5127	1.29971	38.0952	86.4583	8916.12	0	0	0	0	0	0	0	0	0	0	0	0	0	0	0	0	0	0	0	0	0	0	0	0	0	0	0	0	0	0	0	0	0	0	0	3	0	0	0
6 months	1000 m	Leaf	1mm	3	7.42146	50.0316	2.08003	24.0533	46.5208	4316	0	0	0	0	0	0	0	0	0	0	0	0	0	0	0	0	0	0	0	0	1	0	0	0	0	0	8	0	0	0	0	0	0	0	0	0	0	0	0
6 months	1000 m	Leaf	1mm	4	7.20556	49.3761	2.22869	22.1547	50.9649	4292.94	0	0	0	0	0	0	0	0	0	0	0	0	0	1	1	0	0	0	0	0	0	0	0	0	0	0	0	0	0	0	0	0	0	0	0	0	0	0	0
6 months	1000 m	Leaf	1mm	5	7.05145	49.1937	2.0345	24.1798	48.9652	4814.88	0	0	0	0	0	0	0	0	2	0	0	0	0	0	0	0	0	0	0	0	2	0	0	0	0	0	3	0	0	0	0	0	0	0	0	0	0	0	0
6 months	1000 m	Roots	1mm	3	6.58834	49.3264	1.2354	39.9274	69.1005	7204.4	0	0	0	0	0	0	0	0	0	0	0	0	0	0	0	0	0	0	0	0	1	0	0	0	0	0	1	0	0	0	0	0	0	0	0	0	0	0	0
6 months	1000 m	Roots	1mm	4	6.4621	52.2108	1.35704	38.474	88.6019	7526.59	0	0	0	0	0	0	0	0	3	0	0	0	0	0	0	0	0	0	0	0	0	0	0	0	0	0	2	0	0	0	0	0	0	0	1	0	0	0	0
6 months	1000 m	Roots	1mm	5	6.41256	53.4679	1.1022	48.5103	57.0746	7390.78	0	0	0	0	0	0	0	0	7	0	1	0	0	0	0	0	0	0	0	0	0	0	0	0	0	0	2	0	0	0	3	0	0	0	2	2	0	0	0
6 months	1000 m	Leaf	4mm	3	7.47276	48.6154	2.00594	24.2357	58.1916	6243.75	0	0	0	0	0	0	0	0	0	0	0	0	0	0	0	0	0	0	0	0	2	0	0	0	0	0	12	0	0	2	0	0	0	0	0	1	0	0	0
6 months	1000 m	Leaf	4mm	4	7.01839	49.7277	1.90858	26.0548	77.2093	7074.09	0	0	0	0	0	0	0	0	0	0	0	0	0	0	0	0	0	0	0	0	1	0	0	0	0	0	1	0	0	0	0	0	0	0	0	2	0	0	0
6 months	1000 m	Leaf	4mm	5	7.80217	47.6859	2.06139	23.1329	51.4926	6514	0	0	0	0	0	0	0	0	0	0	0	0	0	0	0	0	0	0	0	0	0	0	0	0	0	0	2	0	0	0	0	0	0	0	3	0	0	0	0
6 months	1000 m	Roots	4mm	3	7.14496	54.2445	1.23487	43.9274	53.1527	6769.9	0	0	0	0	0	0	0	0	0	0	0	0	0	0	0	0	0	0	0	0	2	0	0	0	0	0	2	0	0	0	1	0	0	0	1	2	0	0	0
6 months	1000 m	Roots	4mm	4	6.36997	48.196	1.20331	40.053	56.4921	4931.91	0	0	2	0	0	0	0	0	1	0	0	0	0	0	0	0	0	0	0	0	0	0	0	0	0	0	5	0	0	1	0	0	0	0	12	0	0	0	0
6 months	1000 m	Roots	4mm	5	5.93791	50.6665	1.32255	38.3098	40.0103	5962.95	0	0	0	0	0	0	0	0	6	0	0	0	0	0	0	0	0	0	0	0	0	0	0	0	0	0	4	0	0	0	2	0	0	0	1	0	0	0	0
6 months	2000 m	Leaf	45um	3	7.81061	51.7856	0.752777	68.7928	82.4503	7651.76	0	0	0	0	0	0	0	0	0	0	0	0	0	0	0	0	0	0	0	0	0	0	0	0	0	0	0	0	0	0	0	0	0	0	0	0	0	0	0
6 months	2000 m	Leaf	45um	4	5.65045	52.3905	0.739747	70.8222	85.0932	7165.67	0	0	0	0	0	0	0	0	0	0	0	0	0	0	0	0	0	0	0	0	0	0	0	0	0	0	0	0	0	0	0	0	0	0	0	0	0	0	0
6 months	2000 m	Leaf	45um	5	7.38267	50.8655	0.785848	64.7269	94.828	6116.2	0	0	0	0	0	0	0	0	0	0	0	0	0	0	0	0	0	0	0	0	0	0	0	0	0	0	0	0	0	0	0	0	0	0	0	0	0	0	0
6 months	2000 m	Roots	45um	3	7.92994	50.8413	0.748818	67.8954	52.3175	4569.06	0	0	0	0	0	0	0	0	0	0	0	0	0	0	0	0	0	0	0	0	0	0	0	0	0	0	0	0	0	0	0	0	0	0	0	0	0	0	0
6 months	2000 m	Roots	45um	4	7.71446	50.25	0.711463	70.6291	45.4524	5957.56	0	0	0	0	0	0	0	0	0	0	0	0	0	0	1	0	0	0	0	0	0	0	0	0	0	0	0	0	0	0	0	0	0	0	0	0	0	0	0
6 months	2000 m	Roots	45um	5	7.11488	51.1229	0.877602	58.253	31.619	5256.67	0	0	0	0	0	0	0	0	0	0	0	0	0	0	0	0	0	0	0	0	0	0	0	0	0	0	0	0	0	0	0	0	0	0	0	0	0	0	0
6 months	2000 m	Leaf	1mm	3	6.79485	52.0869	0.597227	87.2146	71.915	7359.33	0	0	0	0	0	0	0	0	0	0	0	0	1	0	1	0	0	0	0	0	0	0	0	0	0	0	0	0	0	0	0	0	0	0	0	0	0	0	0
6 months	2000 m	Leaf	1mm	4	7.35401	52.026	0.841988	61.7895	62.5794	7359.33	0	0	0	0	0	0	0	0	0	0	0	0	0	0	1	0	0	0	0	0	0	0	0	0	0	0	0	0	0	0	0	5	0	0	0	0	0	0	0
6 months	2000 m	Leaf	1mm	5	7.20813	50.9659	0.91908	55.4532	82.3629	6923.58	0	0	0	0	0	0	0	0	0	0	0	0	0	0	0	0	0	0	0	0	0	0	0	0	0	0	0	0	0	0	0	0	0	0	0	0	0	0	0
6 months	2000 m	Roots	1mm	3	6.56319	51.6054	1.14479	45.0784	45.198	4554.04	0	0	0	0	0	0	0	0	0	0	0	0	0	0	0	0	0	0	0	0	0	0	0	0	0	0	2	0	0	0	0	0	0	0	0	0	0	0	0
6 months	2000 m	Roots	1mm	4	6.99015	48.67	0.785405	61.968	38.4259	4327.02	0	0	0	0	0	0	0	0	0	0	0	0	0	0	1	0	0	0	0	0	0	0	0	0	0	0	1	0	0	0	0	0	0	0	0	0	0	0	0
6 months	2000 m	Roots	1mm	5	7.71385	50.2717	0.759443	66.1954	46.4771	4205.33	0	0	0	0	0	0	0	0	0	0	0	0	0	0	0	0	0	0	0	0	0	0	0	0	0	0	1	0	0	0	0	0	0	0	0	0	0	0	0
6 months	2000 m	Leaf	4mm	3	6.89549	52.9794	0.915447	57.8727	122.295	9972.43	0	0	0	0	0	0	0	0	0	0	0	0	0	0	3	0	0	0	0	0	0	0	0	0	0	0	0	0	0	0	0	0	0	0	0	0	0	1	0
6 months	2000 m	Leaf	4mm	4	7.49448	53.5028	0.672488	79.5594	94.9947	8710.1	1	0	0	0	0	0	0	0	0	0	0	0	0	0	0	0	0	0	0	0	0	0	0	0	0	0	0	0	0	1	0	0	0	0	0	0	0	0	0
6 months	2000 m	Leaf	4mm	5	7.47563	53.2334	0.866096	61.4636	107.112	7870.4	0	0	0	0	0	0	0	0	0	0	0	0	0	0	0	0	0	0	0	0	0	0	0	0	0	0	0	0	0	1	0	0	0	0	0	0	0	0	0
6 months	2000 m	Roots	4mm	3	7.18791	50.6036	0.851076	59.4584	83.3952	6812.64	0	0	0	0	0	0	0	0	0	0	0	0	0	0	0	0	0	0	0	0	0	0	0	0	0	0	0	0	0	0	0	1	1	0	0	0	0	0	0
6 months	2000 m	Roots	4mm	4	8.8347	45.8223	0.676597	67.7247	46.2364	6399.42	0	0	0	0	0	0	0	0	0	0	0	0	0	0	0	0	0	0	0	0	0	0	0	0	0	0	0	0	0	0	0	0	0	0	0	0	0	0	0
6 months	2000 m	Roots	4mm	5	7.81643	51.3593	0.80663	63.6714	64.0286	5845.41	0	0	0	0	0	0	0	1	0	0	0	0	0	0	0	0	0	0	0	0	0	0	0	0	0	0	1	0	0	0	0	0	0	0	0	0	0	0	0
6 months	3000 m	Leaf	45um	3	6.71127	54.2131	0.882975	61.3983	70.3791	5115.23	0	0	0	0	0	0	0	0	0	0	0	0	0	0	0	0	0	0	0	0	0	0	0	0	0	0	0	0	0	0	0	0	0	0	0	0	0	0	0
6 months	3000 m	Leaf	45um	4	8.59737	52.7852	0.660997	79.8569	82.0983	6202.21	0	0	0	0	0	0	0	0	0	0	0	0	0	0	0	0	0	0	0	0	0	0	0	0	0	0	0	0	0	0	0	0	0	0	0	0	0	0	0
6 months	3000 m	Leaf	45um	5	8.26147	52.8602	0.710802	74.3669	71.3252	5235.74	0	0	0	0	0	0	0	0	0	0	0	0	0	0	0	0	0	0	0	0	0	0	0	0	0	0	0	0	0	0	0	0	0	0	0	0	0	0	0
6 months	3000 m	Roots	45um	3	6.14992	52.2782	0.778506	67.1519	39.2364	4504.8	0	0	0	0	0	0	0	0	0	0	0	0	0	0	0	0	0	0	0	0	0	0	0	0	0	0	0	0	0	0	0	0	0	0	0	0	0	0	0
6 months	3000 m	Roots	45um	4	8.00508	52.3366	0.903999	57.8945	44.3354	4890.99	0	0	0	0	0	0	0	0	0	0	0	0	0	0	0	0	0	0	0	0	0	0	0	0	0	0	0	0	0	0	0	0	0	0	0	0	0	0	0
6 months	3000 m	Roots	45um	5	8.20985	46.9861	0.857975	54.7639	32.0876	5310.86	0	0	0	0	0	0	0	0	0	0	0	0	0	0	0	0	0	0	0	0	0	0	0	0	0	0	0	0	0	0	0	0	0	0	0	0	0	0	0
6 months	3000 m	Leaf	1mm	3	9.48397	53.0355	0.718659	73.7979	93.0879	5559.5	0	0	0	0	0	0	0	0	0	0	0	0	0	0	0	0	0	0	0	0	0	0	0	0	0	0	0	0	0	0	0	0	0	0	0	0	0	0	0
6 months	3000 m	Leaf	1mm	4	7.68958	52.0955	0.679106	76.7119	63.008	5142.67	0	0	0	0	0	0	0	0	0	0	0	0	0	0	0	0	0	0	0	0	0	0	0	0	0	0	0	0	0	0	0	0	0	0	0	0	0	0	0
6 months	3000 m	Leaf	1mm	5	8.00218	52.8918	0.975298	54.2314	79.9728	6522.04	0	0	0	0	0	0	0	0	0	0	0	0	0	0	0	0	0	0	0	0	0	0	0	0	0	0	0	0	0	0	0	0	0	0	0	0	0	0	0
6 months	3000 m	Roots	1mm	3	7.83391	51.4812	0.715627	71.9386	35.5056	5069.76	0	0	0	0	3	0	0	0	0	6	0	0	0	0	0	0	0	0	0	0	0	0	0	0	0	0	0	0	0	0	0	0	0	0	0	0	0	0	0
6 months	3000 m	Roots	1mm	4	8.04632	51.3098	0.677847	75.6952	30.2523	4126.73	0	0	0	0	0	0	0	0	0	0	0	0	0	0	0	0	0	0	0	0	0	0	0	0	0	0	0	0	0	0	0	0	0	0	0	0	0	0	0
6 months	3000 m	Roots	1mm	5	8.69431	52.3267	0.597853	87.5243	48.6933	3696.02	0	0	0	0	0	0	0	0	0	0	0	0	0	0	0	0	0	0	0	0	0	0	0	0	0	0	0	0	0	0	0	0	0	0	0	0	0	0	0
6 months	3000 m	Leaf	4mm	3	7.62754	52.0886	0.661671	78.7228	54.7654	6370.18	0	0	0	0	0	0	0	0	0	0	0	0	0	0	0	0	0	0	0	0	0	2	0	0	0	0	0	0	0	0	0	0	0	0	0	0	0	0	0
6 months	3000 m	Leaf	4mm	4	7.55147	51.8829	0.768441	67.5171	76.8433	7223.89	0	0	0	0	0	0	0	0	0	0	0	0	0	0	0	0	0	0	0	0	0	0	0	0	0	0	0	0	0	0	0	0	0	0	0	0	0	0	0
6 months	3000 m	Leaf	4mm	5	7.99795	51.8728	0.906691	57.211	62.139	5579.63	0	0	0	0	0	0	1	0	0	0	0	0	0	0	0	0	0	0	0	0	0	0	0	0	0	0	0	0	0	0	0	0	0	0	0	0	0	0	0
6 months	3000 m	Roots	4mm	3	6.08807	51.7682	0.792295	65.3396	37.4709	4822.86	0	0	0	0	0	0	0	0	0	0	0	0	0	0	0	0	0	0	0	0	0	0	0	0	0	0	0	0	0	0	0	0	0	0	0	0	0	0	0
6 months	3000 m	Roots	4mm	4	6.22198	46.8231	0.730784	64.0725	42.4742	4284.31	0	0	0	0	0	0	0	0	0	0	0	0	0	0	0	0	0	0	0	0	0	0	0	0	0	0	0	0	0	0	0	0	0	0	0	0	0	0	0
6 months	3000 m	Roots	4mm	5	6.26382	53.9443	0.668504	80.694	32.37	3679.67	0	0	0	0	0	0	0	0	0	0	0	0	0	0	0	0	0	0	0	0	0	0	0	0	0	0	0	0	0	0	0	0	0	0	0	0	0	0	0
12 months	1000 m	Leaf	45um	3	4.16092	50.3002	2.25727	22.2836	111.12	6997.4	0	0	0	0	0	0	0	0	0	0	0	0	0	0	0	0	0	0	0	0	1	0	0	0	0	0	1	0	0	0	0	0	0	0	0	0	0	0	0
12 months	1000 m	Leaf	45um	4	4.95966	49.7922	2.1655	22.9934	102.362	7551.99	0	0	0	0	0	0	0	0	0	0	0	0	0	0	0	1	0	0	0	0	0	0	0	0	0	0	0	0	0	0	0	0	0	0	0	0	0	0	0
12 months	1000 m	Leaf	45um	5	4.67613	50.8644	2.14894	23.6695	95.7498	8686.43	0	0	0	0	0	0	0	0	0	0	0	0	0	0	0	0	0	0	0	0	0	0	0	0	0	0	1	0	0	0	0	0	0	0	0	0	0	0	0
12 months	1000 m	Roots	45um	3	4.24508	49.0108	1.57892	31.0408	130.653	12990	0	0	0	0	0	0	0	0	0	7	0	0	0	0	0	0	0	0	1	0	0	0	0	0	0	0	0	0	0	0	0	0	0	0	3	0	0	0	0
12 months	1000 m	Roots	45um	4	3.91101	49.3213	1.35071	36.5151	153.683	13852.9	0	0	0	0	0	0	0	0	0	5	0	0	0	0	0	0	0	0	0	0	0	0	0	0	0	0	0	0	0	0	0	0	0	0	3	0	0	0	0
12 months	1000 m	Roots	45um	5	3.87647	48.5532	1.33294	36.4258	123.509	12334.1	0	0	0	0	0	0	0	0	0	14	0	0	0	0	0	0	0	0	0	0	0	0	0	0	0	0	1	0	0	0	0	0	0	0	1	0	0	0	0
12 months	1000 m	Leaf	1mm	3	4.64452	50.715	2.53724	19.9882	81.6684	6839.85	0	0	0	0	0	0	0	0	0	0	0	0	0	0	0	0	0	0	0	0	2	0	0	0	0	0	0	0	0	0	0	0	0	0	0	0	0	0	0
12 months	1000 m	Leaf	1mm	4	4.59381	50.0862	2.03688	24.5897	90.6015	7616.05	0	0	0	0	0	0	0	0	0	0	0	0	0	0	0	0	0	0	0	0	0	0	0	0	0	1	2	0	0	0	0	0	0	0	1	0	0	0	0
12 months	1000 m	Leaf	1mm	5	4.54106	47.9458	2.81936	17.0059	87.2137	7072.61	0	0	0	0	0	0	0	0	0	0	0	0	0	0	0	0	0	0	0	5	0	0	0	0	1	0	2	0	0	0	0	0	0	0	0	0	0	0	0
12 months	1000 m	Roots	1mm	3	4.43585	50.9844	1.39165	36.6358	119.58	10458	0	0	0	0	0	0	0	0	0	0	0	0	0	0	0	0	0	0	0	0	0	0	0	0	0	0	0	0	0	0	1	0	0	1	5	0	0	0	0
12 months	1000 m	Roots	1mm	4	4.12905	53.5678	1.34794	39.7404	109.081	9879.11	0	0	0	0	0	0	0	0	1	5	2	0	0	0	0	0	0	0	0	0	0	0	0	0	0	0	0	0	0	0	1	0	0	0	0	0	0	0	0
12 months	1000 m	Roots	1mm	5	5.11016	54.6179	1.44854	37.7054	127.509	11691.1	0	0	0	0	0	0	0	0	2	2	0	0	0	0	0	0	0	0	0	0	0	0	0	0	0	0	3	0	0	0	0	0	0	0	0	0	0	0	0
12 months	1000 m	Leaf	4mm	3	4.69237	51.7272	2.03885	25.3708	69.1667	8727.41	0	0	0	0	0	0	0	0	0	0	0	0	0	0	0	0	0	0	0	0	0	0	0	0	0	0	0	0	1	1	0	0	0	1	0	0	0	0	0
12 months	1000 m	Leaf	4mm	4	5.35738	50.7708	2.21212	22.9512	83.2469	10395.1	0	0	0	0	0	0	0	0	0	0	0	0	0	0	0	0	0	0	0	0	0	0	0	0	0	0	1	0	0	0	0	0	0	0	0	0	0	0	0
12 months	1000 m	Leaf	4mm	5	5.01124	37.1705	1.67388	22.2062	71.7284	9267.31	0	0	0	2	0	0	0	0	0	0	0	0	0	0	0	0	0	0	0	0	0	0	2	1	0	0	0	0	0	0	0	0	0	0	1	0	0	0	0
12 months	1000 m	Roots	4mm	3	3.87823	51.9734	1.09409	47.5039	110.638	11659.2	0	0	0	0	0	0	0	0	0	0	0	0	0	0	0	0	0	0	0	0	0	0	0	0	0	0	2	0	0	0	1	0	0	1	0	0	0	0	0
12 months	1000 m	Roots	4mm	4	4.061	50.0265	1.2798	39.0895	136.859	11368.9	0	0	0	0	0	0	0	0	0	0	0	0	0	0	0	0	0	0	0	0	0	0	0	0	0	0	2	0	0	0	2	0	0	0	0	0	0	0	0
12 months	1000 m	Roots	4mm	5	4.5441	49.2675	1.33621	36.8712	128.069	10661.1	0	0	0	0	0	0	0	0	1	5	0	0	0	0	0	0	0	0	0	0	0	0	0	0	0	0	7	0	0	0	0	0	0	0	0	0	0	0	0
12 months	2000 m	Leaf	45um	3	5.60766	52.0526	0.82726	62.9217	90.094	6849.84	0	0	0	0	0	0	0	0	0	0	0	0	0	0	0	0	0	0	0	0	0	0	0	0	0	0	0	0	0	0	0	0	0	0	0	0	0	0	0
12 months	2000 m	Leaf	45um	4	4.42919	50.9046	1.02786	49.5249	101.703	7084.22	0	0	0	0	0	0	0	0	0	0	0	0	0	0	0	0	0	0	0	0	0	0	0	0	0	0	0	0	0	0	0	0	0	0	0	0	0	0	0
12 months	2000 m	Leaf	45um	5	5.02684	51.4087	0.99885	51.4679	137.538	9199.17	0	0	0	0	0	0	0	0	0	0	0	0	0	0	0	0	0	0	0	0	0	0	0	0	0	0	0	0	0	0	0	0	0	0	0	0	0	0	0
12 months	2000 m	Roots	45um	3	4.99206	50.3722	0.826971	60.9117	102.719	8496.14	0	0	0	0	0	0	0	0	0	0	0	0	0	0	0	0	0	0	0	0	0	0	0	0	0	0	0	0	0	0	0	0	0	0	0	0	0	0	0
12 months	2000 m	Roots	45um	4	5.72591	50.9392	0.830089	61.3659	82.682	7232.45	0	0	0	0	0	0	0	0	0	0	0	0	0	0	0	0	0	0	0	0	0	0	0	0	0	0	0	0	0	0	0	0	0	0	0	0	0	0	0
12 months	2000 m	Roots	45um	5	5.52596	49.9585	0.86991	57.4295	85.2882	7027.33	0	0	0	0	0	0	0	0	0	0	0	0	0	0	0	0	0	0	0	0	0	0	0	0	0	0	0	0	0	0	0	0	0	0	0	0	0	0	0
12 months	2000 m	Leaf	1mm	3	4.45928	52.1811	0.884534	58.9928	117.73	7907.37	0	0	0	0	0	0	0	0	0	0	0	0	0	0	0	0	0	0	0	0	0	0	0	0	0	0	0	0	0	0	0	0	0	0	0	0	0	1	1
12 months	2000 m	Leaf	1mm	4	4.39252	51.1713	1.1303	45.2724	117.938	9128.4	1	0	0	0	0	0	0	1	0	0	0	1	0	0	0	0	0	1	0	0	0	0	0	0	0	0	1	0	0	0	0	0	0	0	0	0	0	1	2
12 months	2000 m	Leaf	1mm	5	5.97634	52.1995	1.06864	48.8466	101.444	6255.43	0	0	0	0	0	0	0	0	0	0	0	0	0	0	0	0	0	0	0	0	0	0	0	0	0	0	1	0	0	0	0	0	0	0	0	0	1	3	7
12 months	2000 m	Roots	1mm	3	5.1261	50.7697	0.763443	66.5009	92.9541	7709.78	0	0	0	0	0	0	0	0	0	0	0	0	0	0	0	0	0	0	0	0	0	0	0	0	0	0	0	0	0	1	0	0	0	0	0	0	0	0	0
12 months	2000 m	Roots	1mm	4	4.79392	50.2435	0.691316	72.6781	77.1655	6608.38	0	0	0	0	0	0	0	0	1	0	0	0	0	0	0	0	0	0	0	0	0	0	0	0	0	0	0	0	0	2	0	0	0	0	0	0	0	0	0
12 months	2000 m	Roots	1mm	5	5.32811	50.0787	0.713074	70.2293	85.1584	7234.07	0	0	0	0	0	0	0	0	0	0	0	0	0	0	0	0	0	0	0	0	0	0	0	0	0	0	0	0	0	0	0	0	0	0	0	0	0	0	0
12 months	2000 m	Leaf	4mm	3	4.39268	51.6732	1.2197	42.3655	72.101	7961.46	0	1	0	0	0	0	0	0	0	0	0	0	0	0	0	0	1	0	0	0	0	0	0	0	0	0	0	0	0	2	0	0	0	0	0	0	1	1	0
12 months	2000 m	Leaf	4mm	4	4.36152	49.7486	0.948968	52.4239	94.2524	9002.04	0	0	0	0	0	0	0	0	0	0	0	0	0	0	0	0	0	0	0	0	0	0	0	0	0	0	0	0	0	0	0	0	0	0	0	0	0	0	0
12 months	2000 m	Leaf	4mm	5	4.77718	53.6655	1.02673	52.2682	62.513	7161.77	0	0	0	0	0	0	0	1	0	0	0	0	0	0	0	0	0	0	0	0	0	0	0	0	0	0	0	0	0	0	0	0	0	0	0	0	0	0	0
12 months	2000 m	Roots	4mm	3	3.94296	50.6855	0.686205	73.8636	91.5441	6114.74	0	0	0	0	0	0	0	0	0	0	0	0	0	0	0	0	0	0	0	0	0	0	0	0	0	0	0	0	0	0	0	0	0	0	0	0	0	0	0
12 months	2000 m	Roots	4mm	4	6.24145	50.5284	0.752357	67.1602	112.632	8626.1	0	0	0	0	0	0	0	1	0	0	0	0	0	0	0	0	0	0	0	0	0	0	0	0	0	0	0	0	0	0	0	0	0	0	0	0	0	0	0
12 months	2000 m	Roots	4mm	5	5.94166	51.0258	0.911305	55.992	133.923	7551.32	0	0	0	0	0	0	0	0	0	0	0	0	0	0	0	0	0	0	0	0	0	0	0	0	0	0	1	0	0	2	0	0	1	0	0	0	0	1	0
12 months	3000 m	Leaf	45um	3	7.00201	52.9297	0.858204	61.675	106.595	6546.94	0	0	0	0	0	0	0	0	0	0	0	0	0	0	0	0	0	0	0	0	0	0	0	0	0	0	0	0	0	0	0	0	0	0	0	0	0	0	0
12 months	3000 m	Leaf	45um	4	6.34351	52.0146	0.953331	54.5609	113.408	7110.71	0	0	0	0	0	0	0	4	0	0	0	0	0	0	0	0	0	0	0	1	0	0	0	0	0	0	0	0	0	0	0	0	0	0	0	0	0	0	0
12 months	3000 m	Leaf	45um	5	7.33984	52.4244	0.748643	70.0259	104.269	6232.23	0	0	0	0	0	0	0	0	0	0	0	0	0	0	0	0	0	0	0	0	0	0	0	0	0	0	0	0	0	0	0	0	0	0	0	0	0	0	0
12 months	3000 m	Roots	45um	3	6.85434	51.7689	0.904525	57.2333	68.9405	5188.59	0	0	0	0	0	0	0	0	0	0	0	0	0	0	0	0	0	0	0	0	0	0	0	0	0	0	0	0	0	0	0	0	0	0	0	0	0	0	0
12 months	3000 m	Roots	45um	4	6.34123	51.1518	0.947156	54.0057	84.272	4906.22	0	0	0	0	0	0	0	0	0	0	0	0	0	0	0	0	0	0	0	0	0	0	0	0	0	0	0	0	0	0	0	0	0	0	0	0	0	0	0
12 months	3000 m	Roots	45um	5	6.5943	52.2952	0.704828	74.1956	64.1364	3817.65	0	0	0	0	0	0	0	0	0	0	0	0	0	0	0	0	0	0	0	0	0	0	0	0	0	0	0	0	0	0	0	0	0	0	0	0	0	0	0
12 months	3000 m	Leaf	1mm	3	6.73202	52.5046	0.792834	66.2239	77.5673	5063.22	0	0	0	0	0	0	0	0	0	0	0	0	0	0	0	0	0	0	0	0	0	0	0	0	0	0	0	0	0	0	0	0	0	0	0	0	0	0	0
12 months	3000 m	Leaf	1mm	4	4.38932	51.8271	0.925906	55.9744	81.7175	5340	0	0	0	0	0	0	0	0	0	0	0	0	0	0	0	0	0	0	0	0	0	0	0	0	0	0	0	0	0	0	0	0	0	0	0	0	0	0	0
12 months	3000 m	Leaf	1mm	5	6.49867	51.939	0.782389	66.3852	76.3475	4485.27	0	0	0	0	0	0	0	0	0	0	0	0	0	0	0	0	0	0	0	0	0	0	0	0	0	0	0	0	0	0	0	0	0	0	0	0	0	0	0
12 months	3000 m	Roots	1mm	3	6.58697	52.3148	0.798773	65.494	97.6743	6862.69	0	0	0	0	0	0	0	2	0	0	0	0	0	0	0	0	0	0	0	0	0	0	0	0	0	0	0	0	0	0	0	0	0	0	0	0	0	0	0
12 months	3000 m	Roots	1mm	4	6.83295	52.8176	0.748721	70.5438	82.2261	5755.38	0	0	0	0	0	1	0	4	0	0	0	0	0	0	0	0	0	0	0	0	0	0	0	0	0	0	0	0	0	0	0	0	0	0	0	0	0	0	0
12 months	3000 m	Roots	1mm	5	6.2885	52.362	0.774235	67.6306	116.697	7405.04	0	0	0	0	0	0	0	0	0	2	0	0	0	0	0	0	0	1	0	0	0	0	0	0	0	0	0	0	0	0	0	0	0	0	0	0	0	0	0
12 months	3000 m	Leaf	4mm	3	6.7264	52.3748	0.835541	62.6837	89.5708	8389.64	0	0	0	0	0	0	0	0	0	0	0	0	0	0	0	0	0	0	0	0	0	0	0	0	0	0	0	0	0	0	0	0	0	0	0	0	0	0	0
12 months	3000 m	Leaf	4mm	4	6.47501	52.0298	1.01609	51.206	89.1985	6836.54	0	0	0	0	0	0	0	0	0	0	0	0	0	0	0	0	0	0	0	0	0	0	0	0	0	0	0	0	0	0	0	0	0	0	0	0	0	0	0
12 months	3000 m	Leaf	4mm	5	6.64803	52.936	0.890813	59.4243	119.52	8948.95	0	0	0	0	0	0	0	0	0	0	0	0	1	0	0	0	0	0	0	0	0	0	0	0	0	0	0	1	0	0	0	0	0	0	0	0	0	0	0
12 months	3000 m	Roots	4mm	3	7.10566	53.1447	0.643797	82.5488	90.9324	5918.34	0	0	0	0	0	0	0	4	0	0	0	0	0	0	0	0	0	0	0	0	0	0	0	0	0	0	0	0	0	0	0	0	0	0	0	0	0	0	0
12 months	3000 m	Roots	4mm	4	5.28838	52.8592	0.794934	66.4951	122.604	8310.54	0	0	0	0	0	0	0	1	0	0	0	0	0	0	0	0	0	0	0	0	0	0	0	0	0	0	0	0	0	0	0	0	0	0	0	0	0	0	0
12 months	3000 m	Roots	4mm	5	6.4961	51.6158	0.655341	78.7617	85.6567	7115.65	0	0	0	0	0	0	0	0	0	0	0	0	0	0	0	0	0	0	0	0	0	0	0	0	0	0	0	0	0	0	0	0	0	0	0	0	0	0	0
[truncated: 145 more columns]
